# Supplementary material for: Metabolomic Predictors of Dysglycemia in Two U.S. Youth Cohorts
Source: MDPI journal article supplement (doi:10.3390/metabo12050404), 2022-04-29
Supplement: s1 [file s1]

**Supplemental Table S1.** Background characteristics of 265 Project Viva youth.

|                                                  | Mean $\pm$ SD or % (N) |
|--------------------------------------------------|------------------------|
| <b>Sociodemographic characteristics</b>          |                        |
| Female sex, % (N)                                | 47.6% (126)            |
| Hispanic ethnicity, % (N)                        | 5.3% (14)              |
| Family history of type 2 diabetes, % (N)         | 0.8% (2)               |
| <i>In utero</i> exposure to gestational diabetes | 3.4% (9)               |
| <b>Characteristics at baseline (age ~10 y)</b>   |                        |
| Age (years)                                      | 12.9 $\pm$ 0.6         |
| Body mass index (BMI) z-score <sup>a</sup>       | 0.67 $\pm$ 1.26        |
| Waist circumference (cm)                         | 73.7 $\pm$ 12.0        |
| Fasting glucose (mmol/L)                         | 5.0 $\pm$ 0.5          |
| Fasting insulin (uU/mL)                          | 14.2 $\pm$ 9.2         |
| Total cholesterol (mg/dL)                        | 155.9 $\pm$ 26.9       |
| Triglycerides (mg/dL)                            | 67.1 $\pm$ 29.9        |
| Low density lipoprotein (LDL; mg/dL)             | 86.1 $\pm$ 23.5        |
| High density lipoprotein (HDL; mg/dL)            | 56.4 $\pm$ 13.4        |
| Tanner stage for pubic hair development $>2$     | 84.2% (223)            |

**a** According to the World Health Organization (WHO) growth reference for children 5-19 years of age.

**Supplemental Table S2.** Metabolites with factor loadings within the top 10% of the first factor of reduced rank regression (RRR).

| Girls                       |                   | Boys                     |                   |
|-----------------------------|-------------------|--------------------------|-------------------|
| Identity                    | #Times in Top 10% | Identity                 | #Times in Top 10% |
| glutamine                   | 4                 | quinolinate              | 5                 |
| citrate                     | 4                 | 2'-deoxyuridine          | 5                 |
| N-acetylvaline              | 4                 | malate                   | 5                 |
| myristate (14:0)            | 4                 | glutamate                | 4                 |
| margarate (17:0)            | 4                 | sarcosine                | 4                 |
| phenylalanine               | 4                 | serine                   | 4                 |
| kynurenate                  | 4                 | lactate                  | 4                 |
| chenodeoxycholate           | 4                 | leucine                  | 4                 |
| ornithine                   | 4                 | N-acetylvaline           | 4                 |
| cystine                     | 4                 | margarate (17:0)         | 4                 |
| serine                      | 4                 | caprate (10:0)           | 4                 |
| adenine                     | 4                 | N-formylmethionine       | 4                 |
| orotate                     | 4                 | orotate                  | 4                 |
| Succinate                   | 4                 | beta-alanine             | 4                 |
| aspartate                   | 3                 | tryptophan               | 4                 |
| asparagine                  | 3                 | tyrosine                 | 4                 |
| cortisol                    | 3                 | thyroxine                | 4                 |
| cortisone                   | 3                 | arginine                 | 4                 |
| creatinine                  | 3                 | urea                     | 4                 |
| glycine                     | 3                 | aspartate                | 3                 |
| glycerate                   | 3                 | asparagine               | 3                 |
| trans-uocanate              | 3                 | cortisol                 | 3                 |
| isoleucine                  | 3                 | creatinine               | 3                 |
| 3-hydroxyisobutyrate        | 3                 | salicylate               | 3                 |
| arachidate (20:0)           | 3                 | glutamine                | 3                 |
| stearate (18:0)             | 3                 | glycine                  | 3                 |
| erucate (22:1n9)            | 3                 | biliverdin               | 3                 |
| lysine                      | 3                 | histidine                | 3                 |
| N6,N6,N6-trimethyllysine    | 3                 | trans-uocanate           | 3                 |
| heptanoate (7:0)            | 3                 | 3-hydroxybutyrate (BHBA) | 3                 |
| hypotaurine                 | 3                 | 3-hydroxyisobutyrate     | 3                 |
| methionine                  | 3                 | palmitate (16:0)         | 3                 |
| 3-hydroxy-3-methylglutarate | 3                 | pentadecanoate (15:0)    | 3                 |
| nicotinamide                | 3                 | myristate (14:0)         | 3                 |
| pantothenate                | 3                 | erucate (22:1n9)         | 3                 |
| 5-methylthioadenosine (MTA) | 3                 | cystine                  | 3                 |
| arachidonate (20:4n6)       | 3                 | hypotaurine              | 3                 |
| inosine                     | 3                 | N-acetylmethionine       | 3                 |
| 5,6-dihydrothymine          | 3                 | taurine                  | 3                 |
| 3-aminoisobutyrate          | 3                 | pantothenate             | 3                 |
| beta-alanine                | 3                 | phenylpyruvate           | 3                 |
| uridine                     | 3                 | arachidonate (20:4n6)    | 3                 |
| ursodeoxycholate            | 3                 | inosine                  | 3                 |
| cholesterol                 | 3                 | urate                    | 3                 |
| arginine                    | 3                 | dihydroorotate           | 3                 |
| urea                        | 3                 | 3-aminoisobutyrate       | 3                 |
| proline                     | 3                 | deoxycholate             | 3                 |
| retinol (Vitamin A)         | 3                 | ursodeoxycholate         | 3                 |
| alanine                     | 2                 | cholesterol              | 3                 |

|                          |   |                             |   |
|--------------------------|---|-----------------------------|---|
| N-acetylalanine          | 2 | citrate                     | 3 |
| salicylate               | 2 | kynurenate                  | 3 |
| glutarate (C5-DC)        | 2 | ornithine                   | 3 |
| gamma-glutamylglutamine  | 2 | proline                     | 3 |
| gamma-glutamyltyrosine   | 2 | retinol (Vitamin A)         | 3 |
| glutamate                | 2 | alanine                     | 2 |
| 5-oxoproline             | 2 | glutarate (C5-DC)           | 2 |
| threonine                | 2 | gamma-glutamyltyrosine      | 2 |
| sarcosine                | 2 | 5-oxoproline                | 2 |
| lactate                  | 2 | threonine                   | 2 |
| biliverdin               | 2 | myo-inositol                | 2 |
| histidine                | 2 | N-acetylleucine             | 2 |
| N-acetylleucine          | 2 | stearate (18:0)             | 2 |
| valine                   | 2 | pipecolate                  | 2 |
| palmitate (16:0)         | 2 | methionine                  | 2 |
| nonadecanoate (19:0)     | 2 | 4-acetamidobutanoate        | 2 |
| pentadecanoate (15:0)    | 2 | linoleate (18:2n6)          | 2 |
| pipecolate               | 2 | chenodeoxycholate           | 2 |
| caprate (10:0)           | 2 | adenine                     | 2 |
| laurate (12:0)           | 2 | guanosine                   | 2 |
| N-acetylmethionine       | 2 | 5,6-dihydrothymine          | 2 |
| cysteine                 | 2 | uridine                     | 2 |
| taurine                  | 2 | alpha-ketoglutarate         | 2 |
| quinolinate              | 2 | succinate                   | 2 |
| phenylpyruvate           | 2 | fumarate                    | 2 |
| 4-acetamidobutanoate     | 2 | N-acetylalanine             | 1 |
| linoleate (18:2n6)       | 2 | cortisone                   | 1 |
| allantoin                | 2 | gluconate                   | 1 |
| urate                    | 2 | gamma-glutamylglutamine     | 1 |
| guanosine                | 2 | glycerate                   | 1 |
| uracil                   | 2 | valine                      | 1 |
| alpha-ketoglutarate      | 2 | arachidate (20:0)           | 1 |
| malate                   | 2 | heptanoate (7:0)            | 1 |
| fumarate                 | 2 | laurate (12:0)              | 1 |
| alpha-tocopherol         | 2 | cysteine                    | 1 |
| serotonin                | 2 | nicotinamide                | 1 |
| tyrosine                 | 2 | phenylalanine               | 1 |
| vanillylmandelate (VMA)  | 2 | 5-methylthioadenosine (MTA) | 1 |
| gluconate                | 1 | allantoin                   | 1 |
| myo-inositol             | 1 | uracil                      | 1 |
| 3-hydroxybutyrate (BHBA) | 1 | alpha-tocopherol            | 1 |
| leucine                  | 1 | vanillylmandelate (VMA)     | 1 |
| dihydroorotate           | 1 | citrulline                  | 1 |
| 2'-deoxyuridine          | 1 |                             |   |
| deoxycholate             | 1 |                             |   |
| tryptophan               | 1 |                             |   |
| citrulline               | 1 |                             |   |

**Supplemental Table S3.** Associations of metabolites measured at baseline (age ~10 y) with natural-log transformed baseline fasting glucose at follow-up (age ~16 y) among 197 boys in the EPOCH Study.

| Associations of metabolites at baseline (age 10 y) with ln-fasting glucose at follow-up (age 16 y) |                              |          |                           |          |
|----------------------------------------------------------------------------------------------------|------------------------------|----------|---------------------------|----------|
|                                                                                                    | Unadjusted ( <i>n</i> = 197) |          | Model 1 ( <i>n</i> = 197) |          |
|                                                                                                    | $\beta$ (95% CI)             | <i>P</i> | $\beta$ (95% CI)          | <i>P</i> |
| <b>Boys (<i>n</i> = 197)</b>                                                                       |                              |          |                           |          |
| Leucine                                                                                            | 0.13 (-0.02, 0.28)           | 0.10     | 0.17 (0.01, 0.33)         | 0.04     |
| Glutamate                                                                                          | -0.06 (-0.15, 0.03)          | 0.18     | -0.08 (-0.17, 0.02)       | 0.14     |
| Arginine                                                                                           | 0.00 (-0.07, 0.07)           | 0.94     | 0.01 (-0.07, 0.08)        | 0.87     |
| Tryptophan                                                                                         | -0.07 (-0.28, 0.14)          | 0.52     | -0.05 (-0.26, 0.16)       | 0.64     |
| Margarate (17:0)                                                                                   | 0.08 (-0.03, 0.18)           | 0.12     | 0.10 (-0.01, 0.20)        | 0.07     |
| Lactate                                                                                            | 0.00 (-0.09, 0.08)           | 0.95     | -0.01 (-0.10, 0.08)       | 0.87     |
| N-Acetylvaline                                                                                     | 0.04 (-0.16, 0.24)           | 0.68     | 0.05 (-0.15, 0.25)        | 0.61     |
| Malate                                                                                             | 0.02 (-0.08, 0.11)           | 0.69     | 0.01 (-0.09, 0.11)        | 0.84     |
| Caprate (10:0)                                                                                     | -0.05 (-0.16, 0.05)          | 0.30     | -0.05 (-0.15, 0.06)       | 0.36     |
| Urea                                                                                               | -0.02 (-0.16, 0.13)          | 0.80     | -0.01 (-0.16, 0.14)       | 0.92     |
| Orotate                                                                                            | 0.01 (-0.08, 0.10)           | 0.83     | 0.01 (-0.09, 0.10)        | 0.89     |
| Thyroxine                                                                                          | 0.00 (-0.16, 0.17)           | 0.98     | 0.01 (-0.16, 0.18)        | 0.94     |
| N-Formylmethionine                                                                                 | 0.05 (-0.08, 0.19)           | 0.46     | 0.05 (-0.09, 0.19)        | 0.47     |
| Sarcosine                                                                                          | 0.00 (-0.10, 0.10)           | 0.96     | -0.01 (-0.11, 0.09)       | 0.84     |
| Quinolate                                                                                          | -0.04 (-0.12, 0.04)          | 0.29     | -0.05 (-0.13, 0.02)       | 0.18     |
| Tyrosine                                                                                           | 0.05 (-0.15, 0.26)           | 0.61     | 0.08 (-0.13, 0.28)        | 0.47     |
| 2'-Deoxyuridine                                                                                    | 0.04 (-0.04, 0.12)           | 0.35     | 0.05 (-0.03, 0.15)        | 0.24     |
| Beta-alanine                                                                                       | 0.00 (-0.12, 0.13)           | 0.95     | 0.01 (-0.12, 0.13)        | 0.94     |
| Serine                                                                                             | 0.00 (-0.16, 0.16)           | 0.97     | 0.02 (-0.15, 0.18)        | 0.83     |

Model 1: Adjusted for age in quartiles at baseline, difference in age between baseline and follow-up, and Hispanic ethnicity.

**Supplemental Table S4.** Associations of metabolites measured at baseline (age ~10 y) with natural-log transformed baseline fasting glucose at follow-up (age ~16 y) among 194 girls in the EPOCH Study.

| <b>Associations of metabolites at baseline (age ~10 y) with ln-fasting glucose at follow-up (age ~16 y)</b> |                                    |                 |                                 |                 |
|-------------------------------------------------------------------------------------------------------------|------------------------------------|-----------------|---------------------------------|-----------------|
|                                                                                                             | <b>Unadjusted (<i>n</i> = 194)</b> |                 | <b>Model 1 (<i>n</i> = 194)</b> |                 |
|                                                                                                             | <b>β (95% CI)</b>                  | <b><i>P</i></b> | <b>β (95% CI)</b>               | <b><i>P</i></b> |
| <b>Girls (<i>n</i> = 194)</b>                                                                               |                                    |                 |                                 |                 |
| Glutamine                                                                                                   | 0.02 (-0.05, 0.09)                 | 0.53            | 0.03 (-0.04, 0.10)              | 0.40            |
| Citrate                                                                                                     | -0.09 (-0.24, 0.05)                | 0.21            | -0.10 (-0.25, 0.05)             | 0.21            |
| N-acetylvaline                                                                                              | 0.15 (-0.17, 0.47)                 | 0.36            | 0.17 (-0.16, 0.49)              | 0.32            |
| Myristate (14:0)                                                                                            | 0.09 (-0.05, 0.22)                 | 0.20            | 0.11 (-0.03, 0.25)              | 0.13            |
| Margarate (17:0)                                                                                            | 0.13 (-0.04, 0.30)                 | 0.12            | 0.14 (-0.04, 0.31)              | 0.12            |
| Phenylalanine                                                                                               | 0.13 (-0.17, 0.42)                 | 0.40            | 0.06 (-0.23, 0.35)              | 0.68            |
| Kynurenate                                                                                                  | -0.03 (-0.14, 0.10)                | 0.69            | -0.02 (-0.15, 0.11)             | 0.76            |
| Chenodeoxycholate                                                                                           | 0.01 (-0.08, 0.09)                 | 0.86            | 0.00 (-0.08, 0.08)              | 0.99            |
| Ornithine                                                                                                   | 0.12 (-0.08, 0.31)                 | 0.24            | 0.15 (-0.07, 0.37)              | 0.17            |
| Cystine                                                                                                     | -0.02 (-0.11, 0.06)                | 0.55            | -0.04 (-0.12, 0.04)             | 0.38            |
| Serine                                                                                                      | 0.03 (-0.24, 0.30)                 | 0.83            | -0.08 (-0.37, 0.21)             | 0.58            |
| Adenine                                                                                                     | 0.03 (-0.14, 0.19)                 | 0.76            | 0.04 (-0.12, 0.20)              | 0.62            |
| Orotate                                                                                                     | -0.16 (-0.29, -0.02)               | 0.02            | -0.14 (-0.28, 0.00)             | 0.05            |
| Succinate                                                                                                   | -0.07 (-0.28, 0.14)                | 0.49            | 0.08 (-0.28, 0.13)              | 0.47            |

Model 1: Adjusted for age in quartiles at baseline, difference in age between baseline and follow-up, and race/ethnicity.
